# Supplementary material
Source: publisher figshare collection journal article supplement (https://acs.figshare.com/ndownloader/files/3868147)
Supplement: Supplementary file 1 [file 3868147]

# *Electrocatalytic and Photocatalytic Hydrogen Production from Acidic and Neutral-pH Aqueous Solutions Using Iron Phosphide Nanoparticles*

Juan F. Callejas,<sup>†,§</sup> Joshua M. McEnaney,<sup>†,§</sup> Carlos G. Read,<sup>†,§</sup> J. Chance Crompton,<sup>‡</sup> Adam J. Biacchi,<sup>†</sup> Eric J. Popczun,<sup>†</sup> Thomas R. Gordon,<sup>†</sup> Nathan S. Lewis,<sup>‡,\*</sup> and Raymond E. Schaak<sup>†,\*</sup>

<sup>†</sup> Department of Chemistry and Materials Research Institute, The Pennsylvania State University, University Park, PA 16802 (USA). <sup>‡</sup> Division of Chemistry and Chemical Engineering, California Institute of Technology, Pasadena, CA 91125 (USA).

<sup>§</sup> These authors contributed equally

## Supplementary Figures

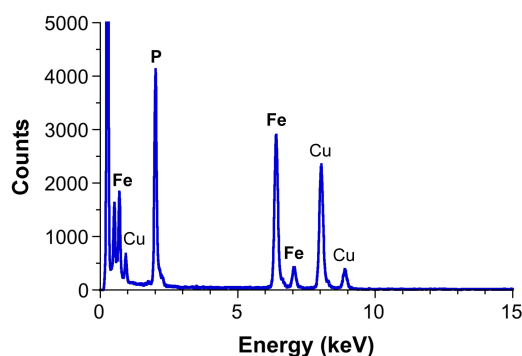

**Figure S1.** EDS spectrum of the as-synthesized FeP nanoparticles.

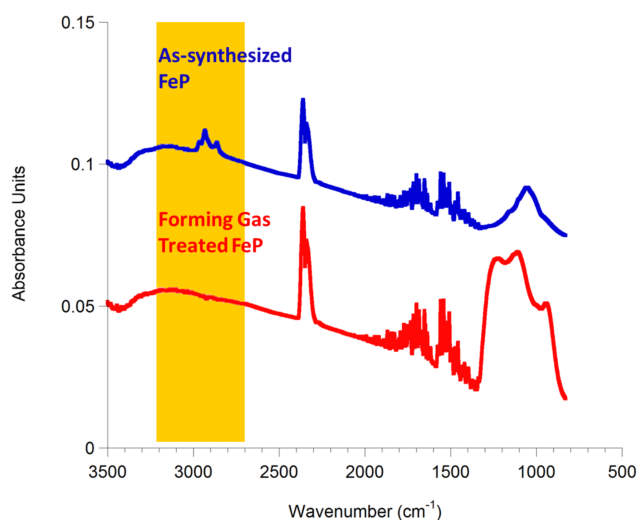

**Figure S2.** DRIFT spectra of FeP nanoparticles as-synthesized (top) and after heating under H<sub>2</sub>(5%)/Ar(95%) to 450 °C (bottom). The region corresponding to the C-H stretching frequencies (present because of the surface ligands in the as-synthesized sample and absent after annealing) is highlighted.

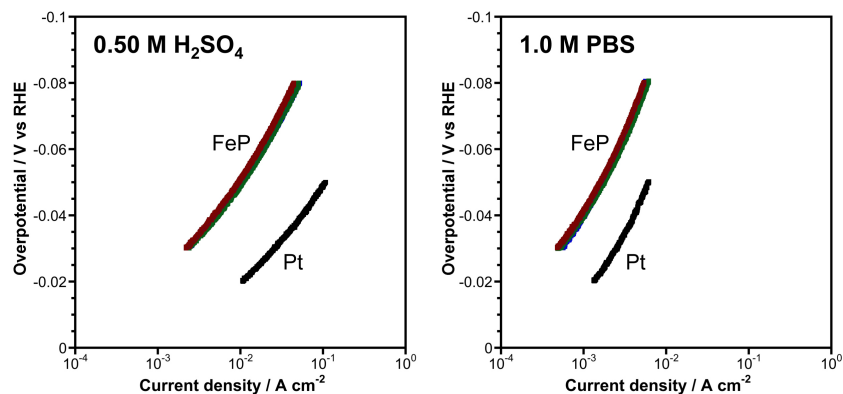

**Figure S3.** Tafel plots of overpotential vs. log(current density) of several FeP/Ti electrodes and of a Pt electrode. The slopes were obtained by applying a linear fit between -30 mV to -80 mV for the FeP samples and -20 mV to -50 mV for the Pt electrode.

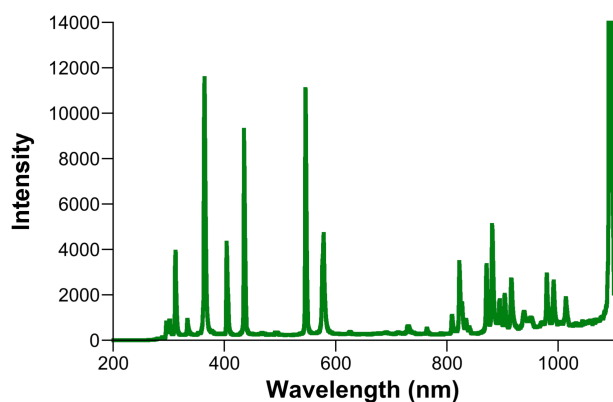

**Figure S4.** Spectrum of the 200 W Hg(Xe) arc lamp used for the photocatalysis experiments.

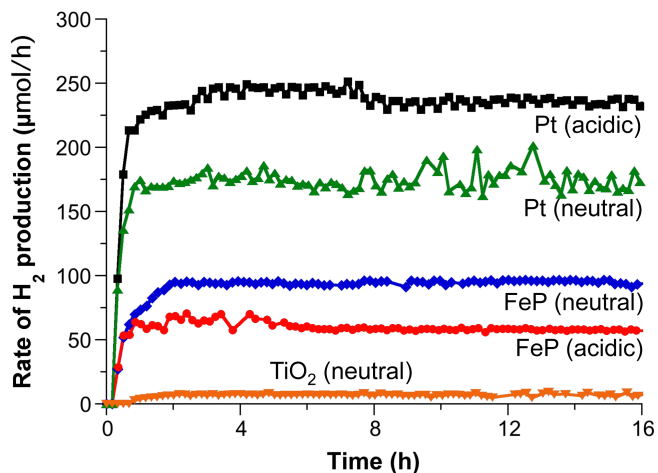

**Figure S5.** Plot showing the rate of photocatalytic H<sub>2</sub> production vs. time for Pt/TiO<sub>2</sub> and FeP/TiO<sub>2</sub> samples, each in acidic and neutral-pH solutions, as well as a TiO<sub>2</sub> control. The FeP data are also included in Figure 4b of the main text. The apparent quantum yields for Pt/TiO<sub>2</sub> in acidic and neutral-pH solutions were 0.222 and 0.163, respectively.

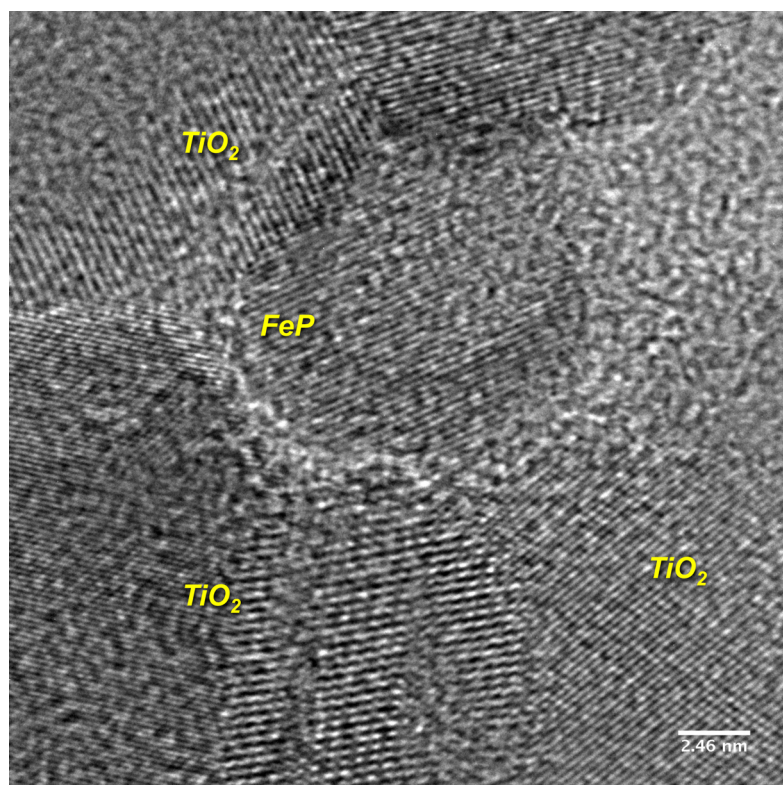

**Figure S6.** HRTEM image of the FeP/TiO<sub>2</sub> sample after 16 h of photocatalytic testing in acidic solution, showing that the size, morphology, and crystallinity of the FeP nanoparticle persisted, as did its interface with the TiO<sub>2</sub> support.

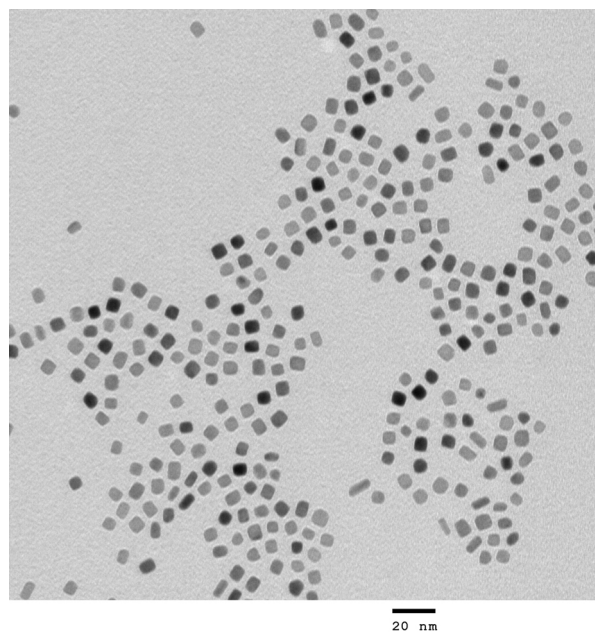

**Figure S7.** TEM image of Pt nanoparticles used as a control in the photocatalysis experiments.
